# Supplementary material for: Why have Swedish primary forests persisted? Their locations, naturalness, and physical representativeness of managed secondary forests
Source: Research Square preprint supplement (doi:10.21203/rs.3.rs-6262217/v1), 2025-05-09
Supplement: Supplementary file 1 [file b440fe40fe894da9851decfd.docx]

**Supplements:**

Table S1: List of maps and databases used in this study.

| **Map Name** | **Producer** | **Source** |
| --- | --- | --- |
| Swedish Land Cover Raster NMD generalized 2018 | Naturvårdsverket | <http://www.naturvardsverket.se/Sa-mar-miljon/Kartor/Nationella-Marktacke-data-NMD/> |
| Mountain Forest Map | Skogsstyrelsen | https://www.lantmateriet.se/sv/nationella-geodataplattformen/datamangder/grans-for-fjallnara-skog/ |
| Productive Land Raster | Naturvårdsverket | https://geodatakatalogen.naturvardsverket.se/geonetwork/srv/swe/catalog.search#/metadata/9c3310f6-73d5-4ae3-865f-0e16e03d44c8 |
| Nationalparker | Naturvårdsverket | <https://metadatakatalogen.naturvardsverket.se/metadatakatalogen/Get>MetaDataById?id=bfc33845-ffb9-4835-8355-76af3773d4e0 |
| Naturreservat | Naturvårdsverket | https://metadatakatalogen.naturvardsverket.se/metadatakatalogen/GetMetaDataById?id=2921b01a-0baf-4702-a89f-9c5626c97844 |
| SCI - Natura 2000 | Naturvårdsverket | https://metadatakatalogen.naturvardsverket.se/metadatakatalogen/GetMetaDataById?id=945e918f-8426-4155-8fd6-3f780a85dd8f |
| SPA – Natura 2000 | Naturvårdsverket | https://metadatakatalogen.naturvardsverket.se/metadatakatalogen/GetMetaDataById?id=a80bf3d7-e70c-42d1-9b8d-8148e53e011d |
| Biotopskydd | Skogsstyrelsen | https://geodpags.skogsstyrelsen.se/geodataport/feeds/Biotopskydd.xml |
| Övrig Biotopskydd | Naturvårdsverket | https://metadatakatalogen.naturvardsverket.se/metadatakatalogen/GetMetaDataById?id=c3dd73b1-1c82-4db5-aac3-c8c6f240fa25 |
| Naturvårdsavtal | Skogsstyrelsen | https://geodpags.skogsstyrelsen.se/geodataport/feeds/Naturvardsavtal.xml |
| Nyckelbiotoper | Skogsstyrelsen | https://geodpags.skogsstyrelsen.se/geodataport/feeds/Nyckelbiotoper.xml |
| Storskogsbrukets nyckelbiotoper | Skogsstyrelsen | https://geodpags.skogsstyrelsen.se/geodataport/feeds/StorskogsbrNyckelb.xml |
| Skyddsvarda Statliga Skogar | Naturvårdsverket | https://geodata.naturvardsverket.se/planeringsunderlag_o_strategier/wms?layers=Statlig_Natur_och_Urskogsinventering |
| IFL_2020 | IFL Mapping Team | https://intactforests.org/data.ifl.html |
| GSD-Elevation data | Lantmäteriet | https://www.lantmateriet.se/sv/geodata/vara-produkter/produktlista/markhojdmodell-nedladdning-grid-50/ |
| Soil Moisture Index | Naturvårdsverket | https://geodatakatalogen.naturvardsverket.se/geonetwork/srv/swe/catalog.search#/metadata/cae71f45-b463-447f-804f-2847869b19b0 |
| 1939 Road Map | Riksarkivet | https://sok.riksarkivet.se/arkiv/MpcDuqySWIH1G22iGEjE31 |
| Vattendragslinjer_nätverk_2016 | SMHI | https://www.smhi.se/data/utforskaren-oppna-data/vattendrag-natverk-svar2016#:~:text=Vattendragslinjer%2C%20%C3%A4r%20linjer%20genom%20sj%C3%B6ar,vattendrag%20med%20vattendragsidentitet%20och%20namn. |
| Flottning - Underlag och metoder for statusklassning av hydromorfologi | Vattenmyndigherterna | https://viss.lansstyrelsen.se/ReferenceLibrary/51868/PM_Flottning.pdf |
| Flottningslämningar i Blekinge, Kronoberg och Skåne län – Inventeringar och metodstudie. | Länsstyrelsen i Kronobergs län | https://catalog.lansstyrelsen.se/store/54/resource/DG_2013_15 |
| Jordarter 1:25 000–1:100 000 | SGU | https://apps.sgu.se/kartvisare/kartvisare-jordarter-25-100.html |
| Clearcuts | Skogstyrelsen. | https://www.skogsstyrelsen.se/laddanergeodata |

Table S2: Definition of each naturalness class within the primary forest category, including their proposed names and their size. For more detailed information, see Buchwald (2005).

| Primary Forest Naturalness Scale | | | |
| --- | --- | --- | --- |
| Naturalness level | Name | Size | Definition |
| 10 | Primeval forest | Landscape | Never modified by civilization even indirectly. |
| 9 | Virgin forest | Forest | Unmodified by man. No signs of selective cutting or grazing.  If any impact of man should no longer be visible AND should have not been greater than native animals. |
| 8 | Frontier forest | Landscape | Presence of limited human traditional activities – that are of low impact. Structure and composition driven by natural disturbance. Patches of different age group. Large enough for wide ranging species. |
| 7 | Near-virgin forest | Forest | Can have been subject to cutting and grazing in the past. But long ago enough that structure and composition now resemble a 9. Patches of different age group |
| 6 | Old-growth forest | Stand | Can have been subject to cutting and grazing in the past.  Have structure of forest in late developmental stage (old trees, range of tree size, dead wood, mixed canopy layer. |
| 5 | Long untouched Forest | Stand | Unmodified by man in the last 60-80 years. Signs of former human activity are visible. |

Table S3: Information collected about primary forests.

| **Administrative Information** | | |
| --- | --- | --- |
| FOR_EXT | Forest extent in hectares. Amount of the total area which is registered as forest area |
| TOT_AREA | Area extent in hectares |
| PROT_SINCE | Year of first protective measures |
| PROT_STATUS | Status of protective measures (nature reserve, national park, or NA) |
| PROT_TYPE | Type of protective measures:  *Minimum intervention*: is the area left for free development or only some small interventions.  *Designed management*: for a special purpose and involves a lot of measures taken like felling, cleaning or thinning trees,  *Traditional management*: management to keep historical practices like haying and grazing in place |
| CONTACT | Institution responsible for the area |
| RECENT_MAN | Year of most recent management plan |
| N2000 | Registered as Natura2000 (Yes=1; No=0) |
| OWNER | Legal owner of the land |
| **Historical Information** | | |
| MAX_AGE | Maximum Age |
| MLAST_DIST_TYPE | The type of most recent man-made disturbance |
| MLAST_DIST_YEAR | Year of most recent man-made disturbance |
| MLAST_DIST_INTENSITY | Intensity of man-made disturbance on a scale of 0 to 5. The number should be based on impact and scale. A 5 means that the whole area is heavily affected. A 0 means no impact at all  This can be a combination of different disturbances over time |
| NLAST_DIST_TYPE | Type of most recent natural disturbance |
| NLAST_DIST_YEAR | Year of most recent natural disturbance |
| NLAST_DIST_INTENSITY | Intensity of natural disturbance on a scale of 0 to 5. The number should be based on impact, time since disturbance and scale. A 5 means that the whole area is recently heavily affected. A 0 means no impact at all.  This can be a combination of different disturbances over time. |
| LOGGING | Impact of past logging on a scale of 0 to 3. The number should be based on impact, time since disturbance and scale.  This **only** applies to selective logging, clear-cuts are **excluded**. |
| THINNING | Records of past thinning (Yes=1, No=0) |
| CLEANING | Records of past cleaning (Yes=1, No=0) |
| GRAZING | Records of past grazing (Yes=1, No=0), from cattle or reindeer |
| CHARCOAL | Records of past charcoal production (Yes=1, No=0) |
| CHALKING | Records of past chalking (Yes=1, No=0) |
| **Current State and Future Management** | | |
| DEADWOOD_P | Presence of Deadwood (Yes=1; No=0) |
| FIRE_PREV | Active fire prevention (Yes=1; No=0) |
| FIRE_POSSIBLE | Possible prescribed burning (Yes=1; No=0)  If yes, this area should be excluded. |
| RE_EXOT | Removal of exotic species (Yes=1; No=0) |
| CLEANING | Cleaning around big old trees (Yes=1; No=0) |
| DEADWOOD_T | Free to collect deadwood (Yes=1; No=0) |
| HUNTING | Allowed to hunt (Yes=1; No=0) |
| RENSKÖTSEL | Allowed to herd reindeers (Yes=1; No=0) |
| MIL | Used for military training (Yes=1; No=0) |
| FREE_DEV | Nature left to develop freely (Yes=1; No=0) |


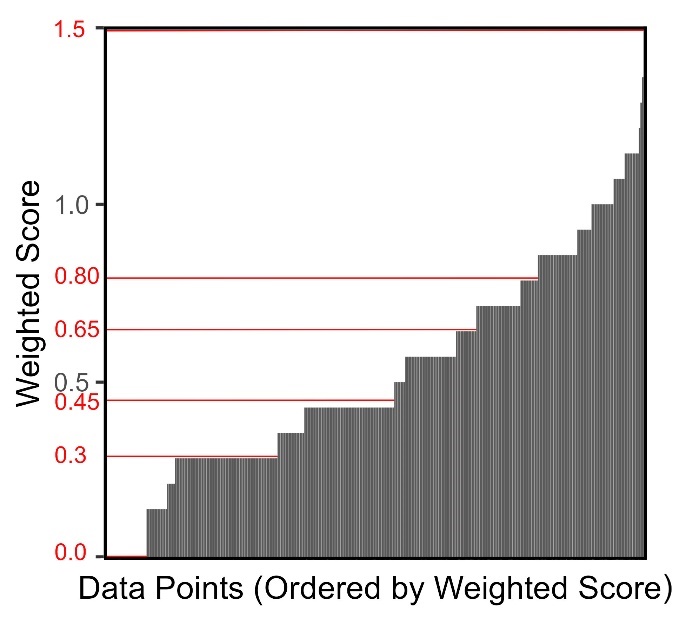


Figure S1: Distribution of the weighted score and breaks are shown in red.
